# Supplementary material for: Measurement Report: concentrations and composition profiles of sugars and amino acids in atmospheric fine particulates: identify local primary sources characteristics
Source: Copernicus journal article supplement (doi:10.5194/acp-2022-269), 2022-05-02
Supplement: Supplementary file 1 [file acp-2022-269-supplement.pdf]

# **Concentrations and composition profiles of sugars and amino acids in atmospheric fine particulates : identify local primary sources characteristics**

Ren-Guo Zhu<sup>1,3</sup>, Hua-Yun Xiao<sup>2,\*</sup>, Liqin Cheng<sup>1,3</sup>, Huixiao Zhu<sup>1,3</sup>, Hongwei Xiao<sup>1</sup>, Yunyun Gong<sup>1</sup>

<sup>1</sup>Jiangxi Province Key Laboratory of the Causes and Control of Atmospheric Pollution, East China University of Technology, Nanchang 330013, China.

<sup>2</sup>School of Environmental Science and Engineering, Shanghai Jiao Tong University, Shanghai 200240, China

<sup>3</sup>School of School of Water Resources and Environmental Engineering, East China University of Technology, Nanchang 330013, China.

*Corresponding author:* Hua-Yun Xiao (Xiaohuayun@sjtu.edu.cn)

## **Table of Contents**

|           |          |
|-----------|----------|
| Table S1  | Page S3  |
| Table S2  | Page S4  |
| Figure S1 | Page S5  |
| Figure S2 | Page S6  |
| Figure S3 | Page S7  |
| Figure S4 | Page S8  |
| Figure S5 | Page S9  |
| Figure S6 | Page S10 |
| Figure S7 | Page S11 |
| Figure S8 | Page S12 |

Table 1. The Characteristics of sampling sites.

| <b>Sampling sites</b> | <b>characteristics</b>                                                                                                                                                                         |
|-----------------------|------------------------------------------------------------------------------------------------------------------------------------------------------------------------------------------------|
| <b>Urban</b>          | an area characterized by high traffic volumes (1,042 vehicles h <sup>-1</sup> ), high population density (8,399 people km <sup>-2</sup> ) and low vegetation coverage (29%).                   |
| <b>Rural</b>          | open area influenced by agricultural activities                                                                                                                                                |
| <b>Forest</b>         | ~20 km from the city center, characterized by low traffic volumes (24 vehicles h <sup>-1</sup> ), low population density (315 people km <sup>-2</sup> ), and high vegetation coverage (71.2%). |

Table S2. Calibration curves parameters, limits of detection (LOD), relative standard deviation (RSD), recoveries and of the sugar standards.

| <b>Compounds</b>    | <b>Compound class</b> | <b>Concentration range<br/>(ng <math>\mu\text{L}^{-1}</math>)</b> | <b>Slope</b> | <b>Intercept</b> | <b>r<sup>2</sup></b> | <b>LOD(ng <math>\mu\text{L}^{-1}</math>)</b> | <b>LOD(ng m<sup>-3</sup>)</b> | <b>RSD(%)</b> | <b>Recovery(%)</b> |
|---------------------|-----------------------|-------------------------------------------------------------------|--------------|------------------|----------------------|----------------------------------------------|-------------------------------|---------------|--------------------|
| <b>Levoglucosan</b> | Anhydrosaccharides    | 1.6-162.1                                                         | 0.0156       | -0.0252          | 0.999                | 0.8                                          | 1.0                           | 3.2           | 106.5±3.4          |
| <b>Mannosan</b>     | Anhydrosaccharides    | 1.6-162.1                                                         | 0.0193       | -0.0114          | 0.987                | 0.6                                          | 0.7                           | 8.8           | 102.6±9.1          |
| <b>Galactosan</b>   | Anhydrosaccharides    | 1.6-162.1                                                         | 0.0392       | -0.0351          | 0.988                | 0.8                                          | 1.0                           | 3.5           | 89.4±3.1           |
| <b>Galactose</b>    | Monosaccharides       | 1.8-180.2                                                         | 0.0320       | -0.0195          | 0.995                | 0.9                                          | 1.1                           | 3.1           | 107.9±3.3          |
| <b>Ribose</b>       | Monosaccharides       | 1.5-150.1                                                         | 0.0340       | -0.0278          | 0.991                | 0.4                                          | 0.5                           | 6.0           | 90.4±5.4           |
| <b>Fructose</b>     | Monosaccharides       | 1.8-180.2                                                         | 0.0178       | -0.0246          | 0.991                | 0.5                                          | 0.6                           | 5.3           | 104.2±5.5          |
| <b>Glucose</b>      | Monosaccharides       | 1.8-180.2                                                         | 0.0128       | -0.0974          | 0.975                | 0.9                                          | 1.1                           | 7.0           | 107.7±7.6          |
| <b>Sucrose</b>      | Disaccharides         | 3.4-342.3                                                         | 0.0286       | -0.0261          | 0.990                | 0.7                                          | 0.8                           | 1.7           | 104.4±1.8          |
| <b>Maltose</b>      | Disaccharides         | 3.6-360.3                                                         | 0.0129       | -0.0173          | 0.984                | 0.8                                          | 1.0                           | 5.5           | 97.9±5.4           |
| <b>Turanose</b>     | Disaccharides         | 3.4-342.3                                                         | 0.0194       | -0.0381          | 0.986                | 0.9                                          | 1.1                           | 3.2           | 95.0±3.0           |
| <b>Lactulose</b>    | Disaccharides         | 3.4-342.3                                                         | 0.0208       | -0.0243          | 0.982                | 0.8                                          | 1.0                           | 4.4           | 108.0±4.8          |
| <b>Trehalose</b>    | Disaccharides         | 3.8-378.3                                                         | 0.0271       | -0.0195          | 0.989                | 0.6                                          | 0.7                           | 2.7           | 91.4±2.5           |
| <b>Arabitol</b>     | Sugar alcohols        | 1.5-152.2                                                         | 0.0268       | -0.0392          | 0.999                | 0.4                                          | 0.5                           | 10.8          | 91.8±9.0           |
| <b>Mannitol</b>     | Sugar alcohols        | 1.8-182.2                                                         | 0.004        | -0.0558          | 0.950                | 0.2                                          | 0.2                           | 8.4           | 93.5±7.9           |
| <b>Pinitol</b>      | Sugar alcohols        | 1.9-194.2                                                         | 0.0262       | -0.0213          | 0.992                | 0.4                                          | 0.5                           | 10.2          | 94.8±9.6           |
| <b>inositol</b>     | Sugar alcohols        | 1.8-180.2                                                         | 0.0278       | -0.0124          | 0.984                | 0.6                                          | 0.7                           | 11.6          | 108.8±12.6         |

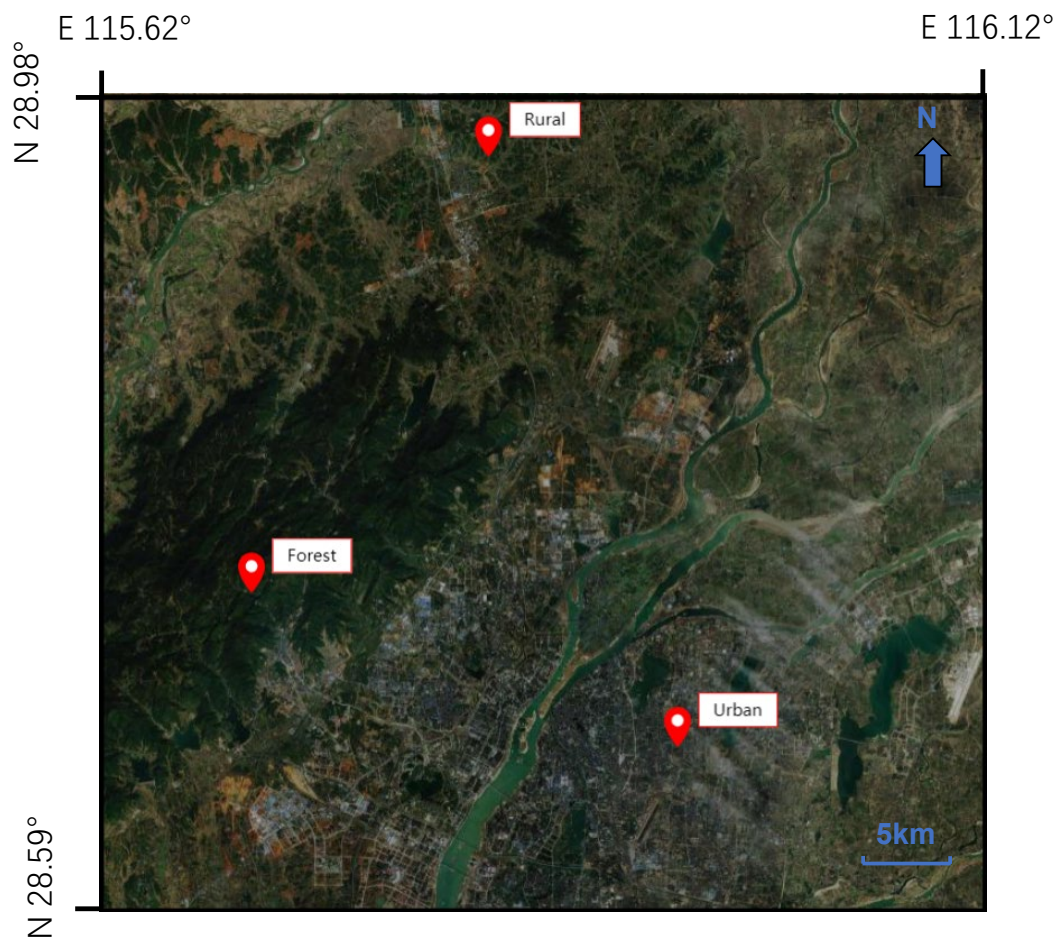

Figure 1. Map showing the locations of the sampling stations. The locational map was modified from MAPWORLD (<https://map.tianditu.gov.cn/>).

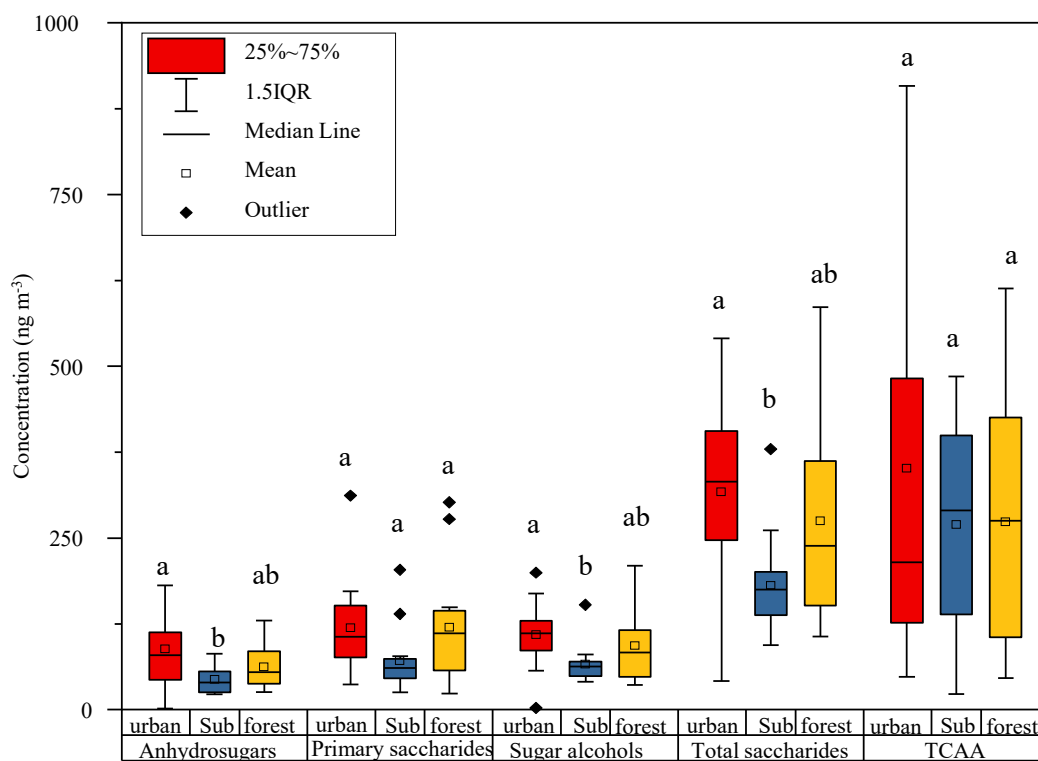

Figure S2. Concentrations of anhydrosugars, primary saccharides, sugar alcohols, total saccharides and TCAA in PM<sub>2.5</sub> sampled from urban, rural and forest sites. The box encloses 50% of the data, the whisker is 1.5 interquartile range of the data, the horizontal bar is the median, hollow square is mean and solid diamond are outliers. Different lower case letters denote means found to be statistically different between sites (one-way ANOVA,  $p < 0.05$ ).

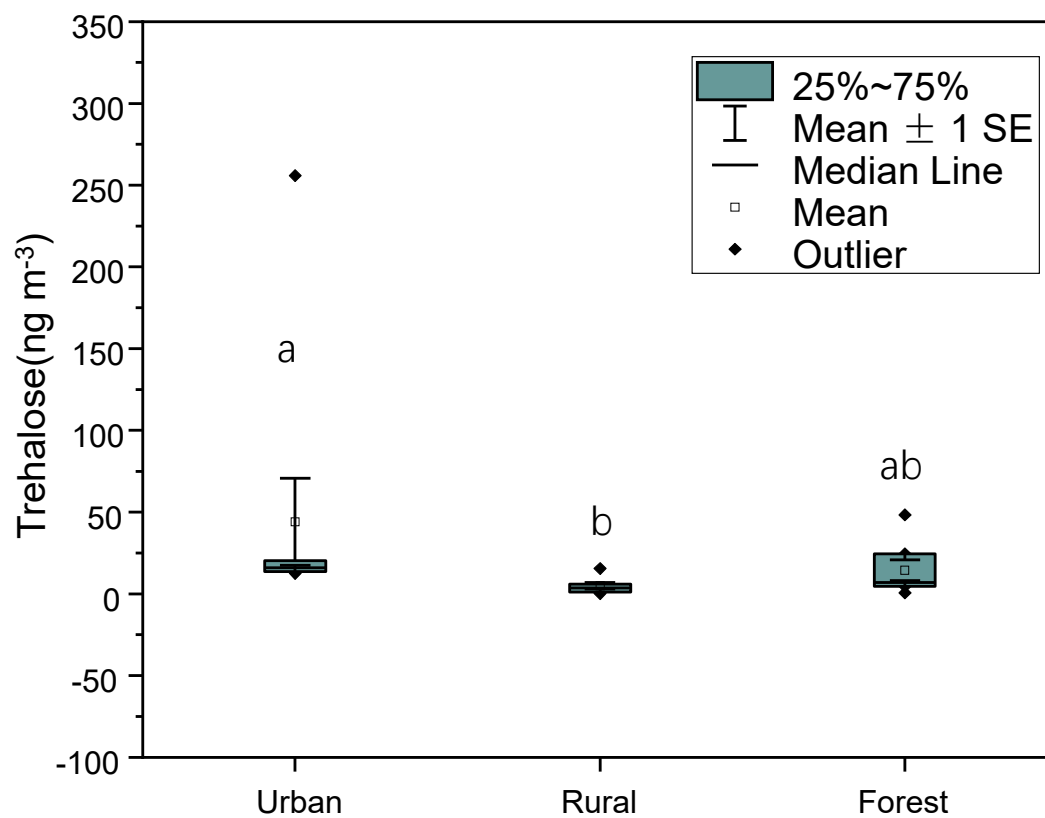

Figure S3. Concentrations of trehalose in PM<sub>2.5</sub> sampled from urban, rural and forest sites. The box encloses 50% of the data, the whisker is standard error of the data, the horizontal bar is the median, hollow square is mean and solid diamond are outliers. Different lower case letters denote means found to be statistically different between sites (one-way ANOVA,  $p < 0.05$ ).

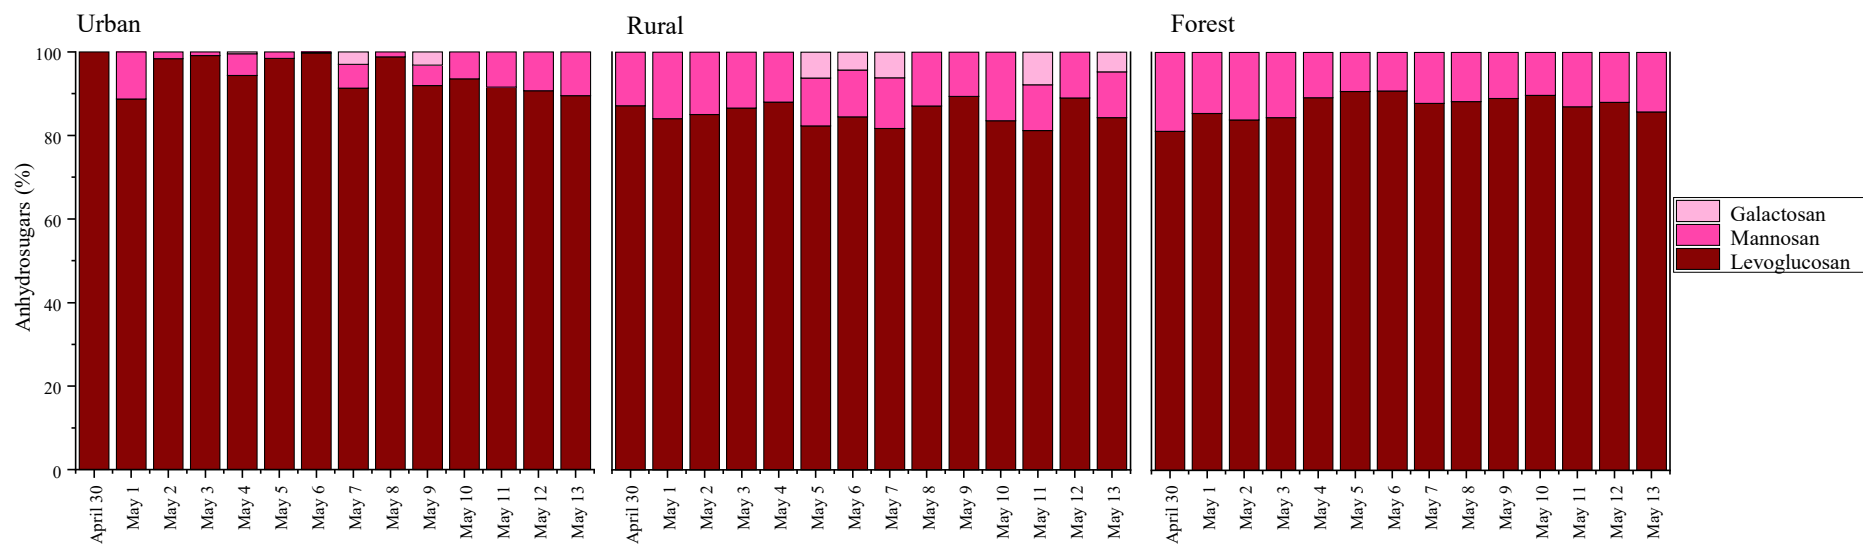

Figure S4. The percent distributions of each individual anhydrosugars (% of total anhydrosugars) in PM2.5 sampled in urban, rural and forest sites.



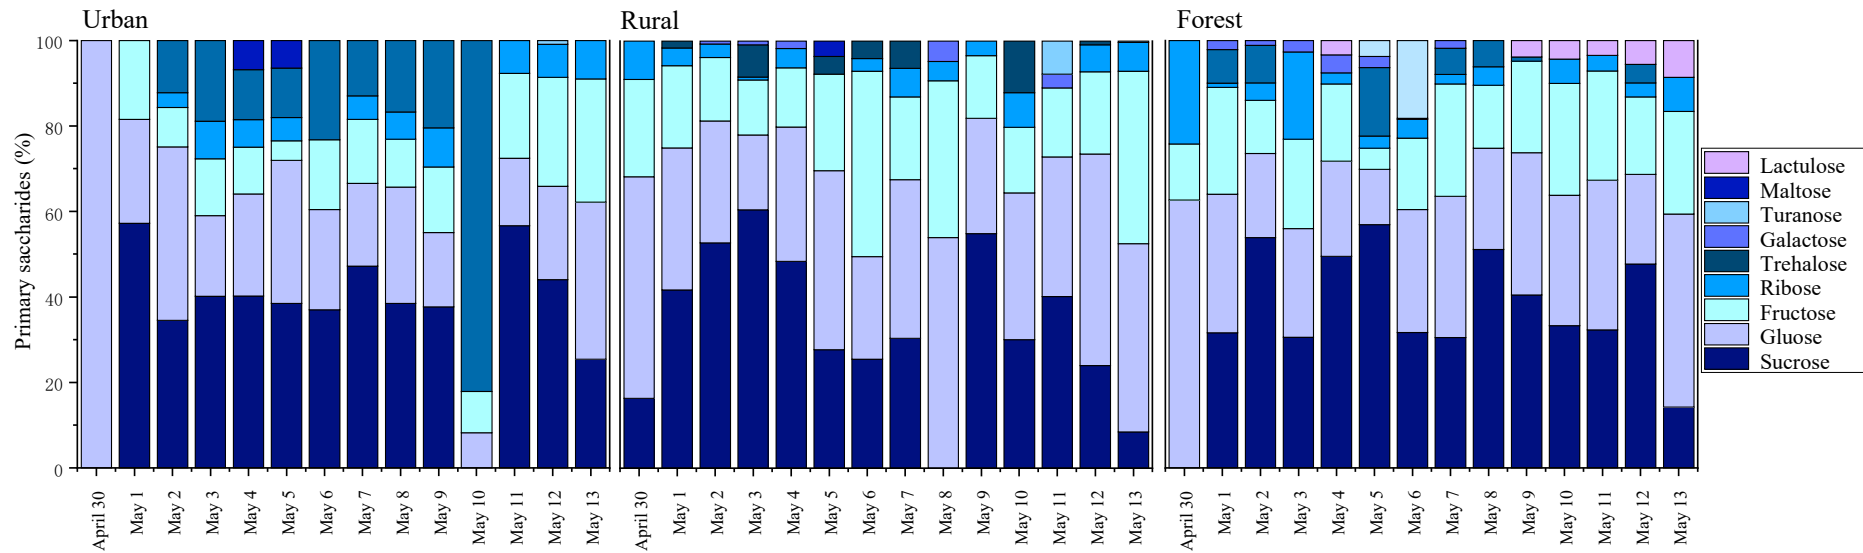

Figure S5. The percent distributions of each individual primary saccharides (% of total primary saccharides) in PM<sub>2.5</sub> sampled in urban, rural and forest sites.

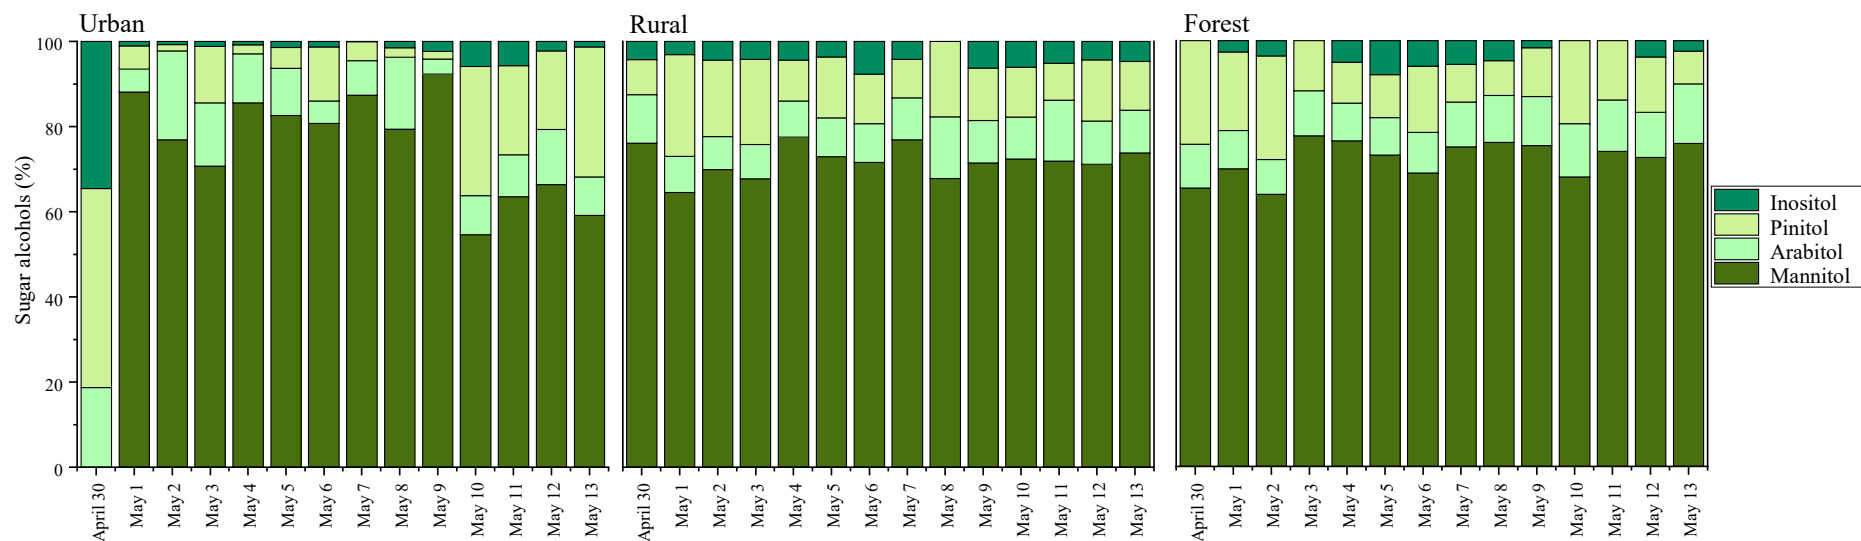

Figure S6. The percent distributions of each individual sugar alcohols (% of total sugar alcohols) in PM2.5 sampled in urban, rural and forest sites.

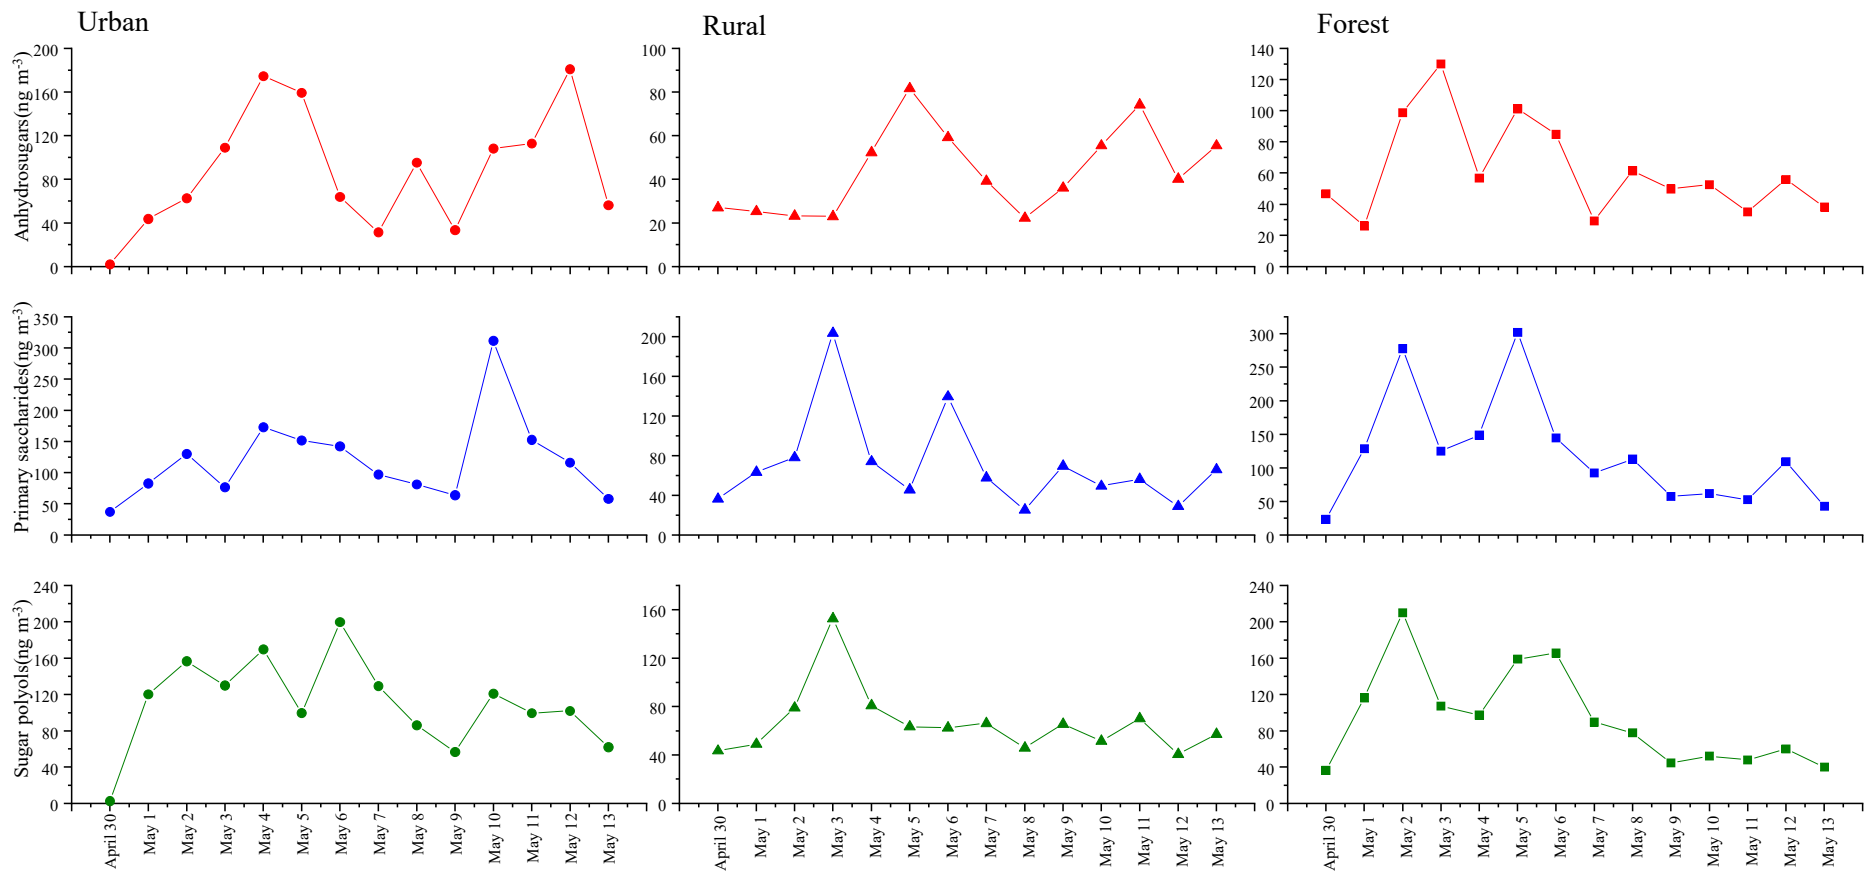

Figure S7. Temporal variations in the concentrations of anhydrosugars, primary saccharides and sugar alcohols detected in PM<sub>2.5</sub> at urban, rural and forest sites.

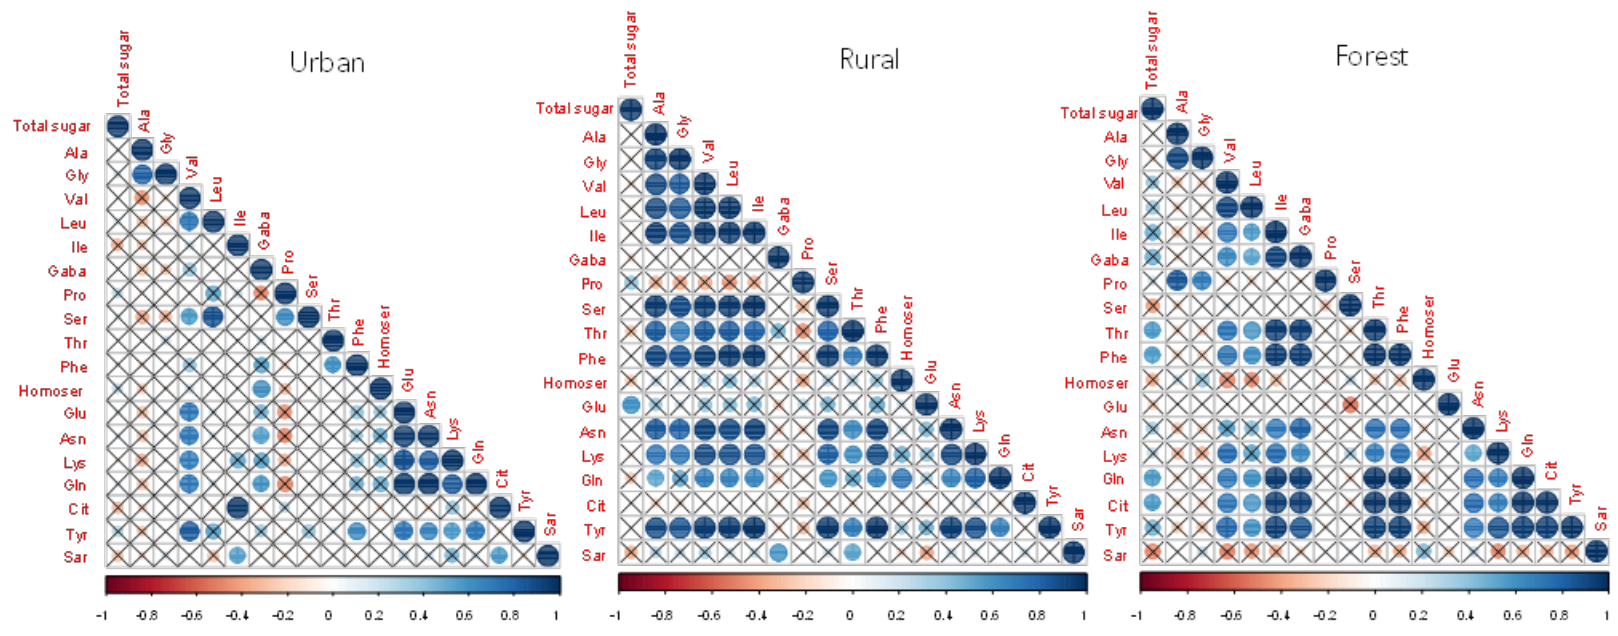

Figure S8. Pearson correlations between  $\Sigma$ sugar concentrations and individual FAA species in PM2.5 collected in urban, rural and forest sites. The cross indicates a  $p$ -value higher than 0.05. The ball indicates a  $p$ -value less than 0.05. The larger a ball is, the more significant the correlation is
